# Supplementary material for: An essential periplasmic protein coordinates lipid trafficking and is required for asymmetric polar growth in mycobacteria
Source: eLife journal article supplement (doi:10.7554/elife.80395), 2022-11-08
Supplement: fig2-figsupp2-data2 [file elife-80395-fig2-figsupp2-data2-v2.zip]

PgfA-3xFLAG+  
MmpL3-msfGFP

PgfA-3xFLAG

L

washes

E

L

washes

E
