# Supplementary figures and images for: An essential periplasmic protein coordinates lipid trafficking and is required for asymmetric polar growth in mycobacteria
Source: eLife journal article supplement (doi:10.7554/elife.80395), 2022-11-08

Strains expressing:

PgfA-FLAG+ PgfA-FLAG  
MmpL3-msfGFP

PgfA-FLAG

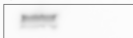

Supplement: fig2-data2 [file elife-80395-fig2-data2-v2.zip]

PgfA-3xFLAG+  
MmpL3-msfGFP

PgfA-3xFLAG

L

washes

E

L

washes

E

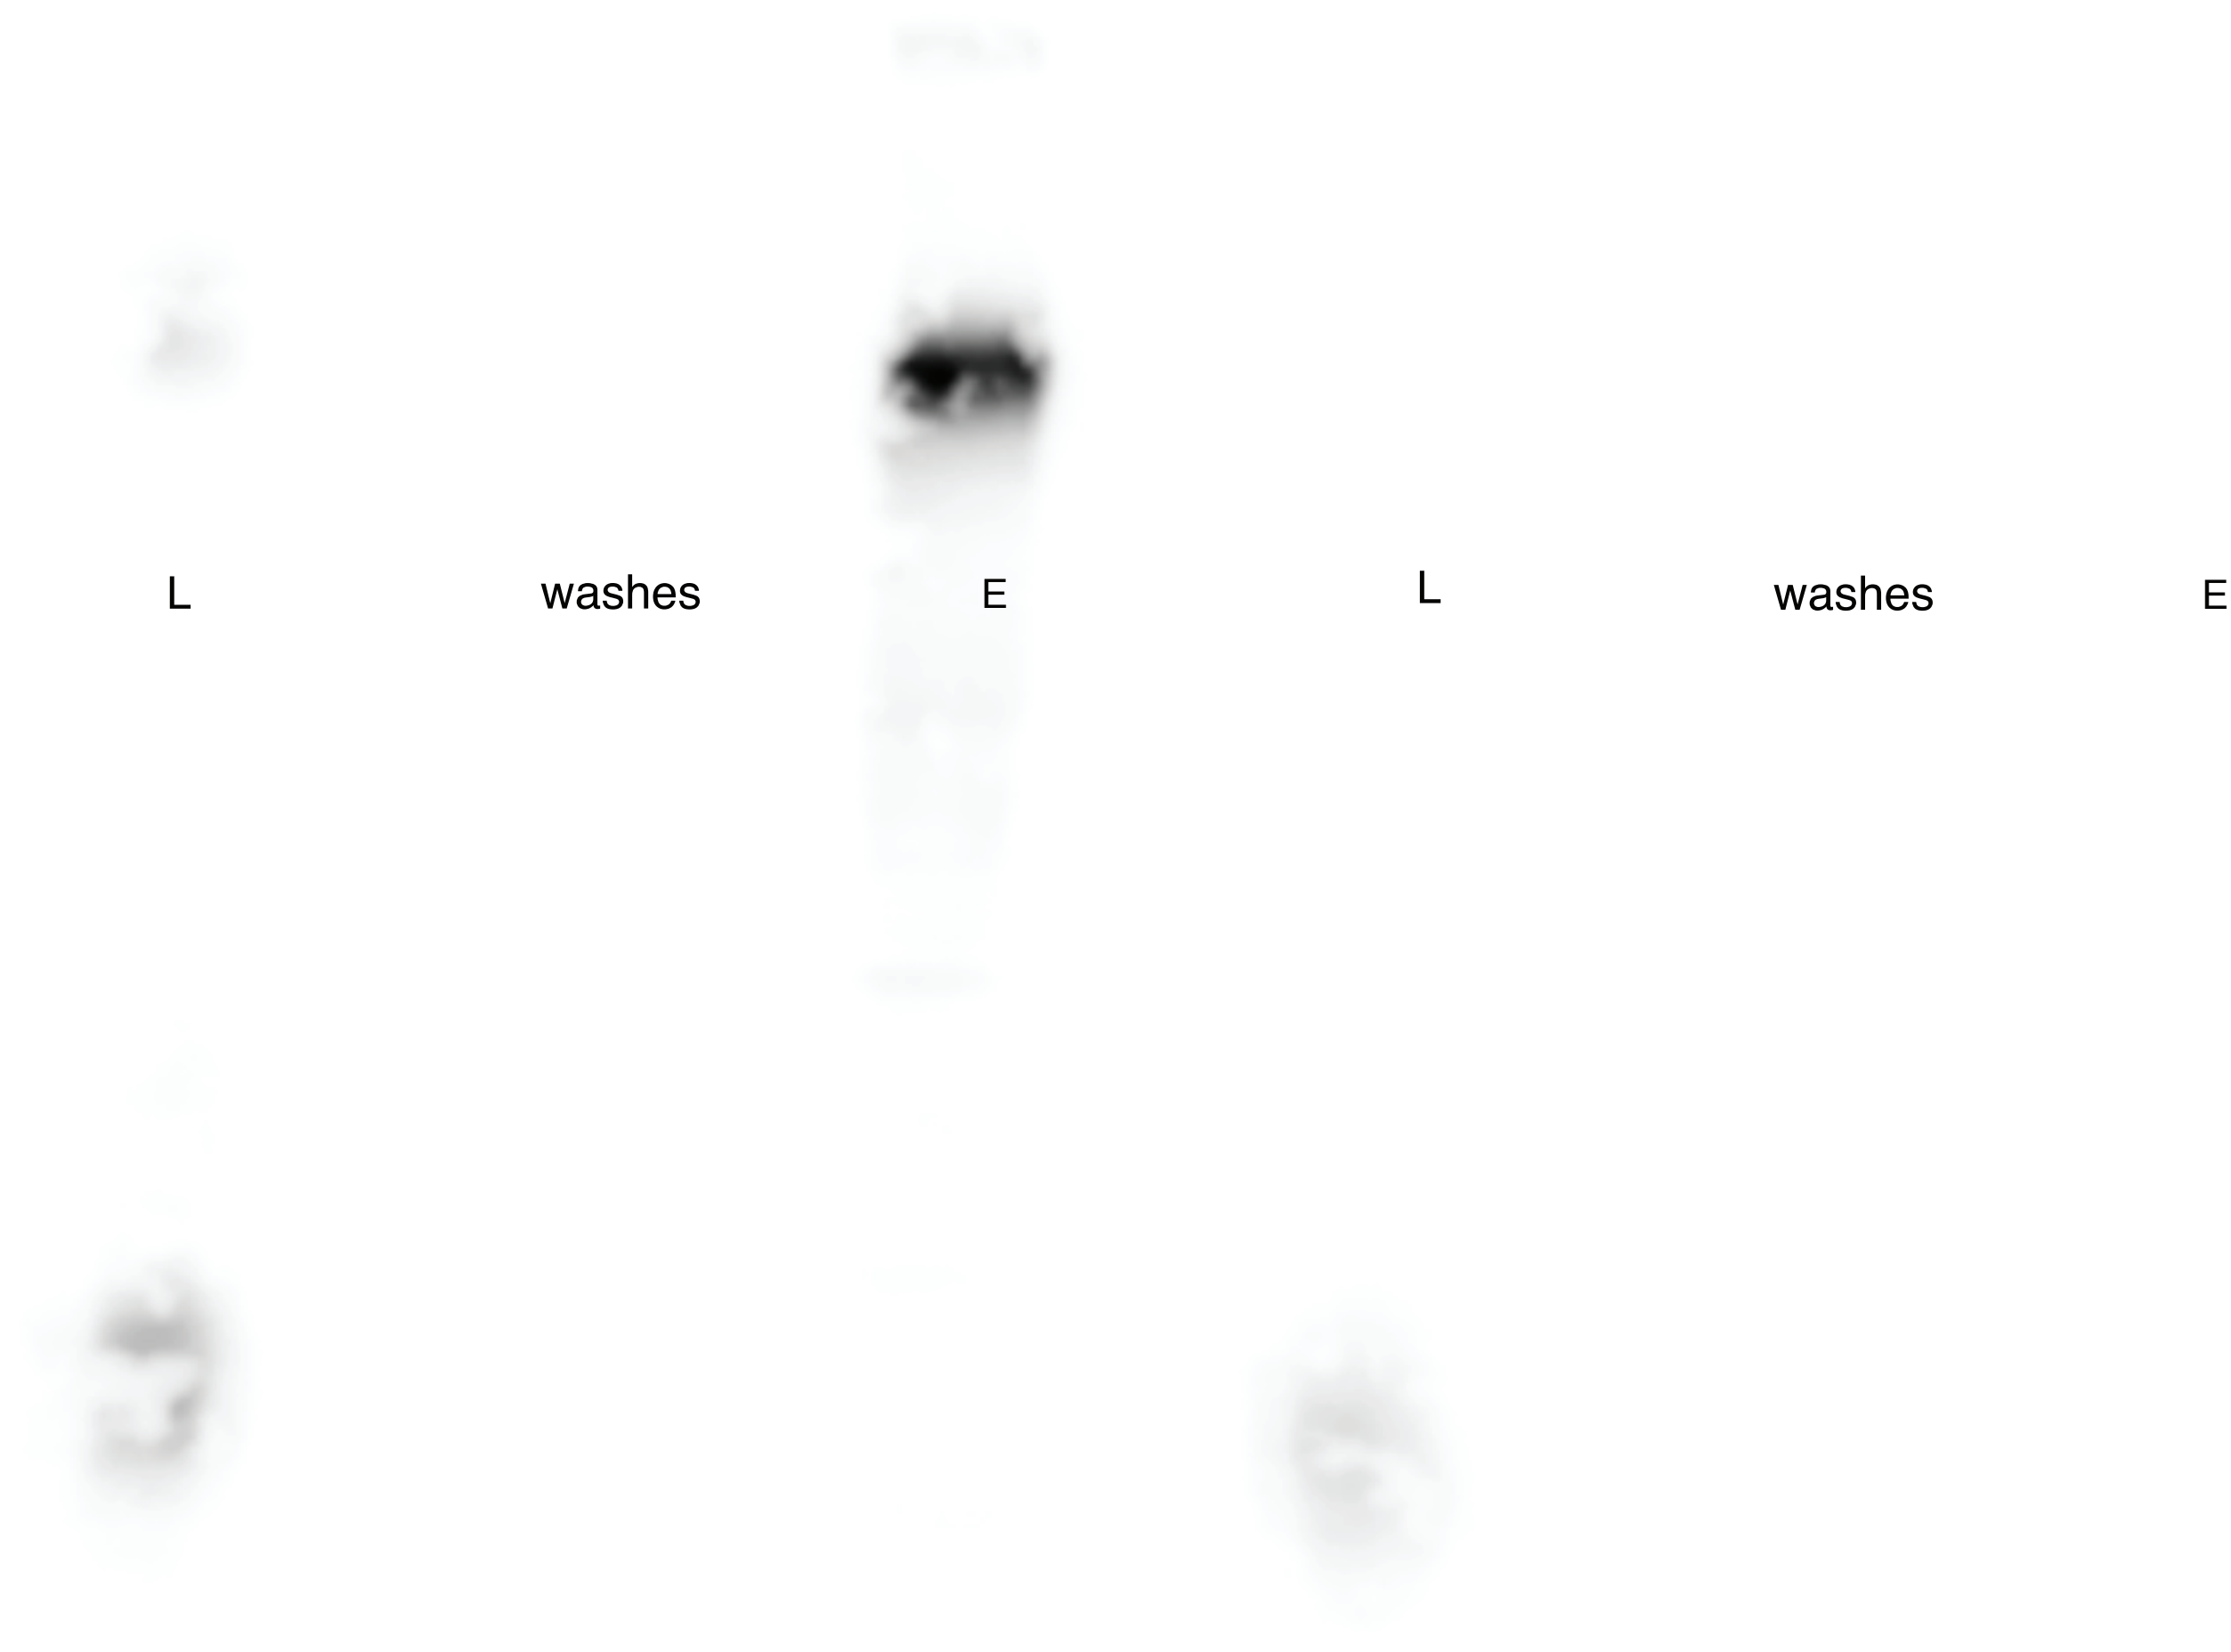

Supplement: fig2-figsupp2-data4 [file Figure 2 - figure supplement 2 - source data 4.pdf › Figure 2 - figure supplement 2 - source data 4.pdf]

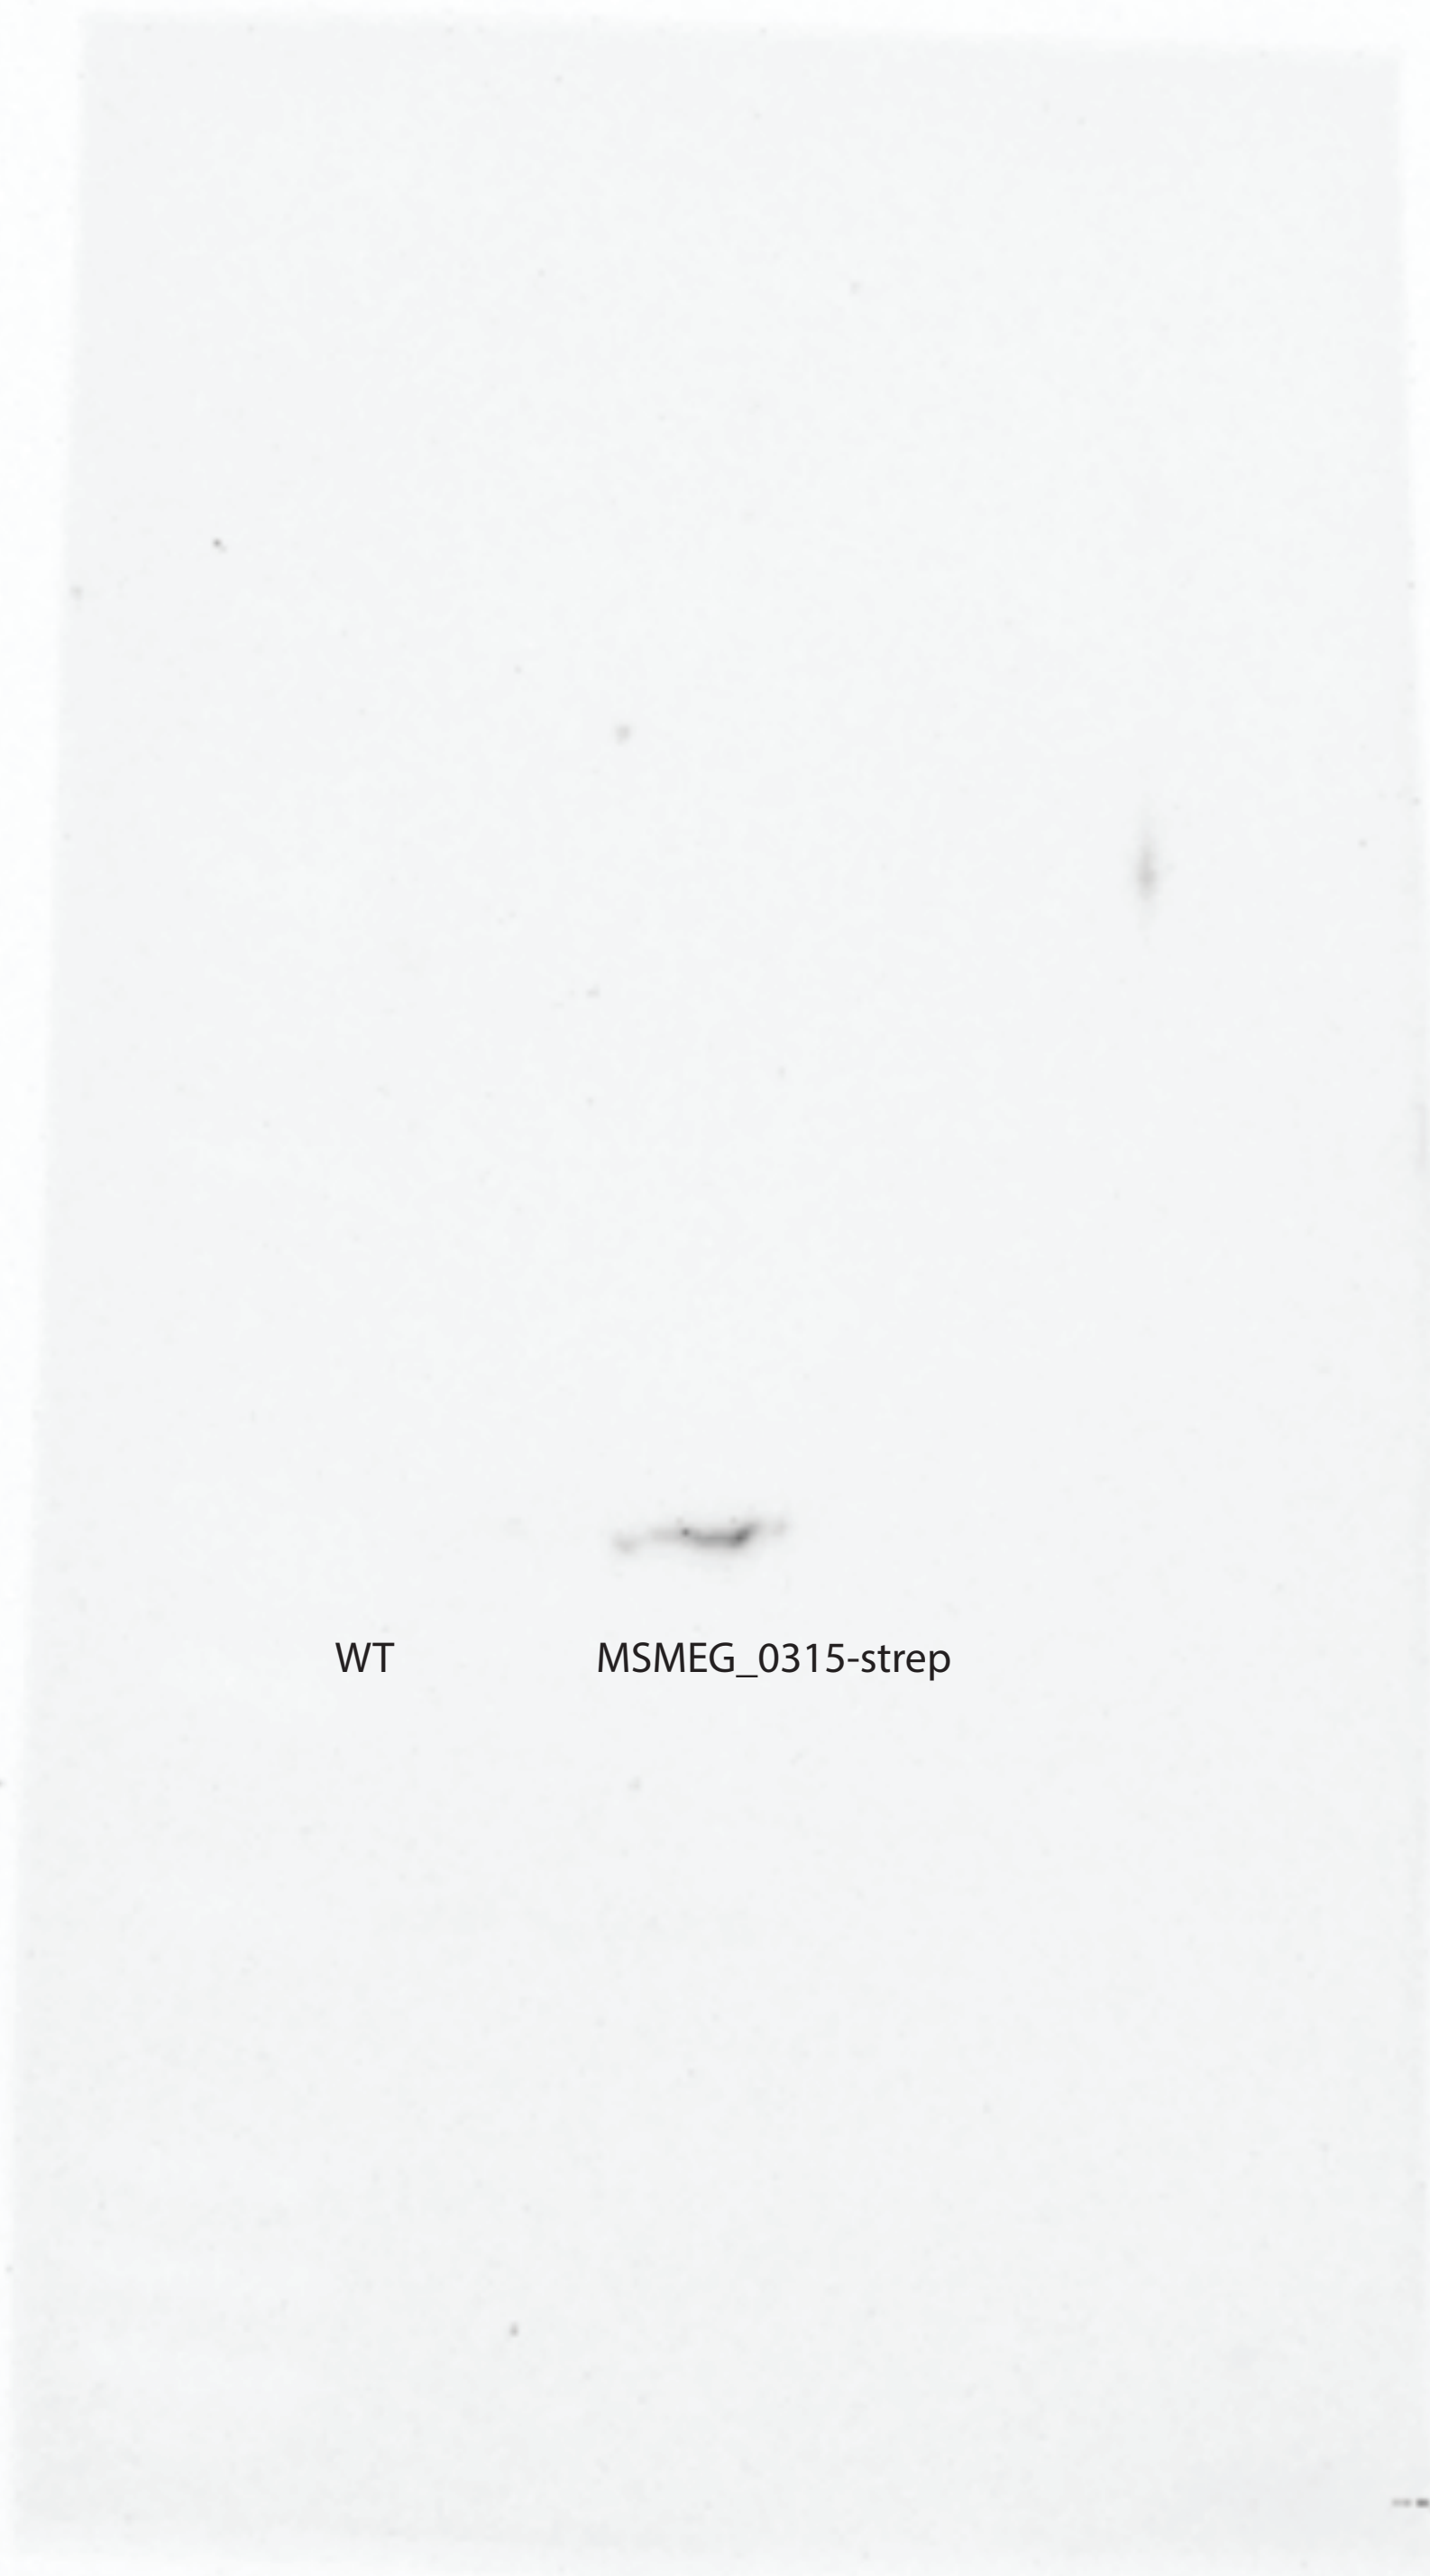

WT

MSMEG\_0315-strep

Supplement: fig2-figsupp4-data2 [file Figure 2 - figure supplement 4 - source data 2.pdf › Figure 2 - figure supplement 4 - source data 2.pdf]

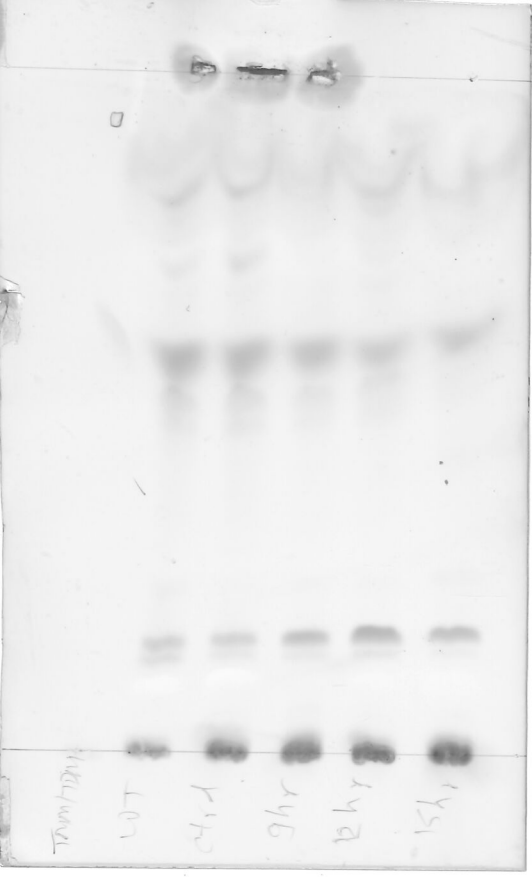

← TDM

← TMM

Supplement: fig3-data2 [file elife-80395-fig3-data2-v2.zip]

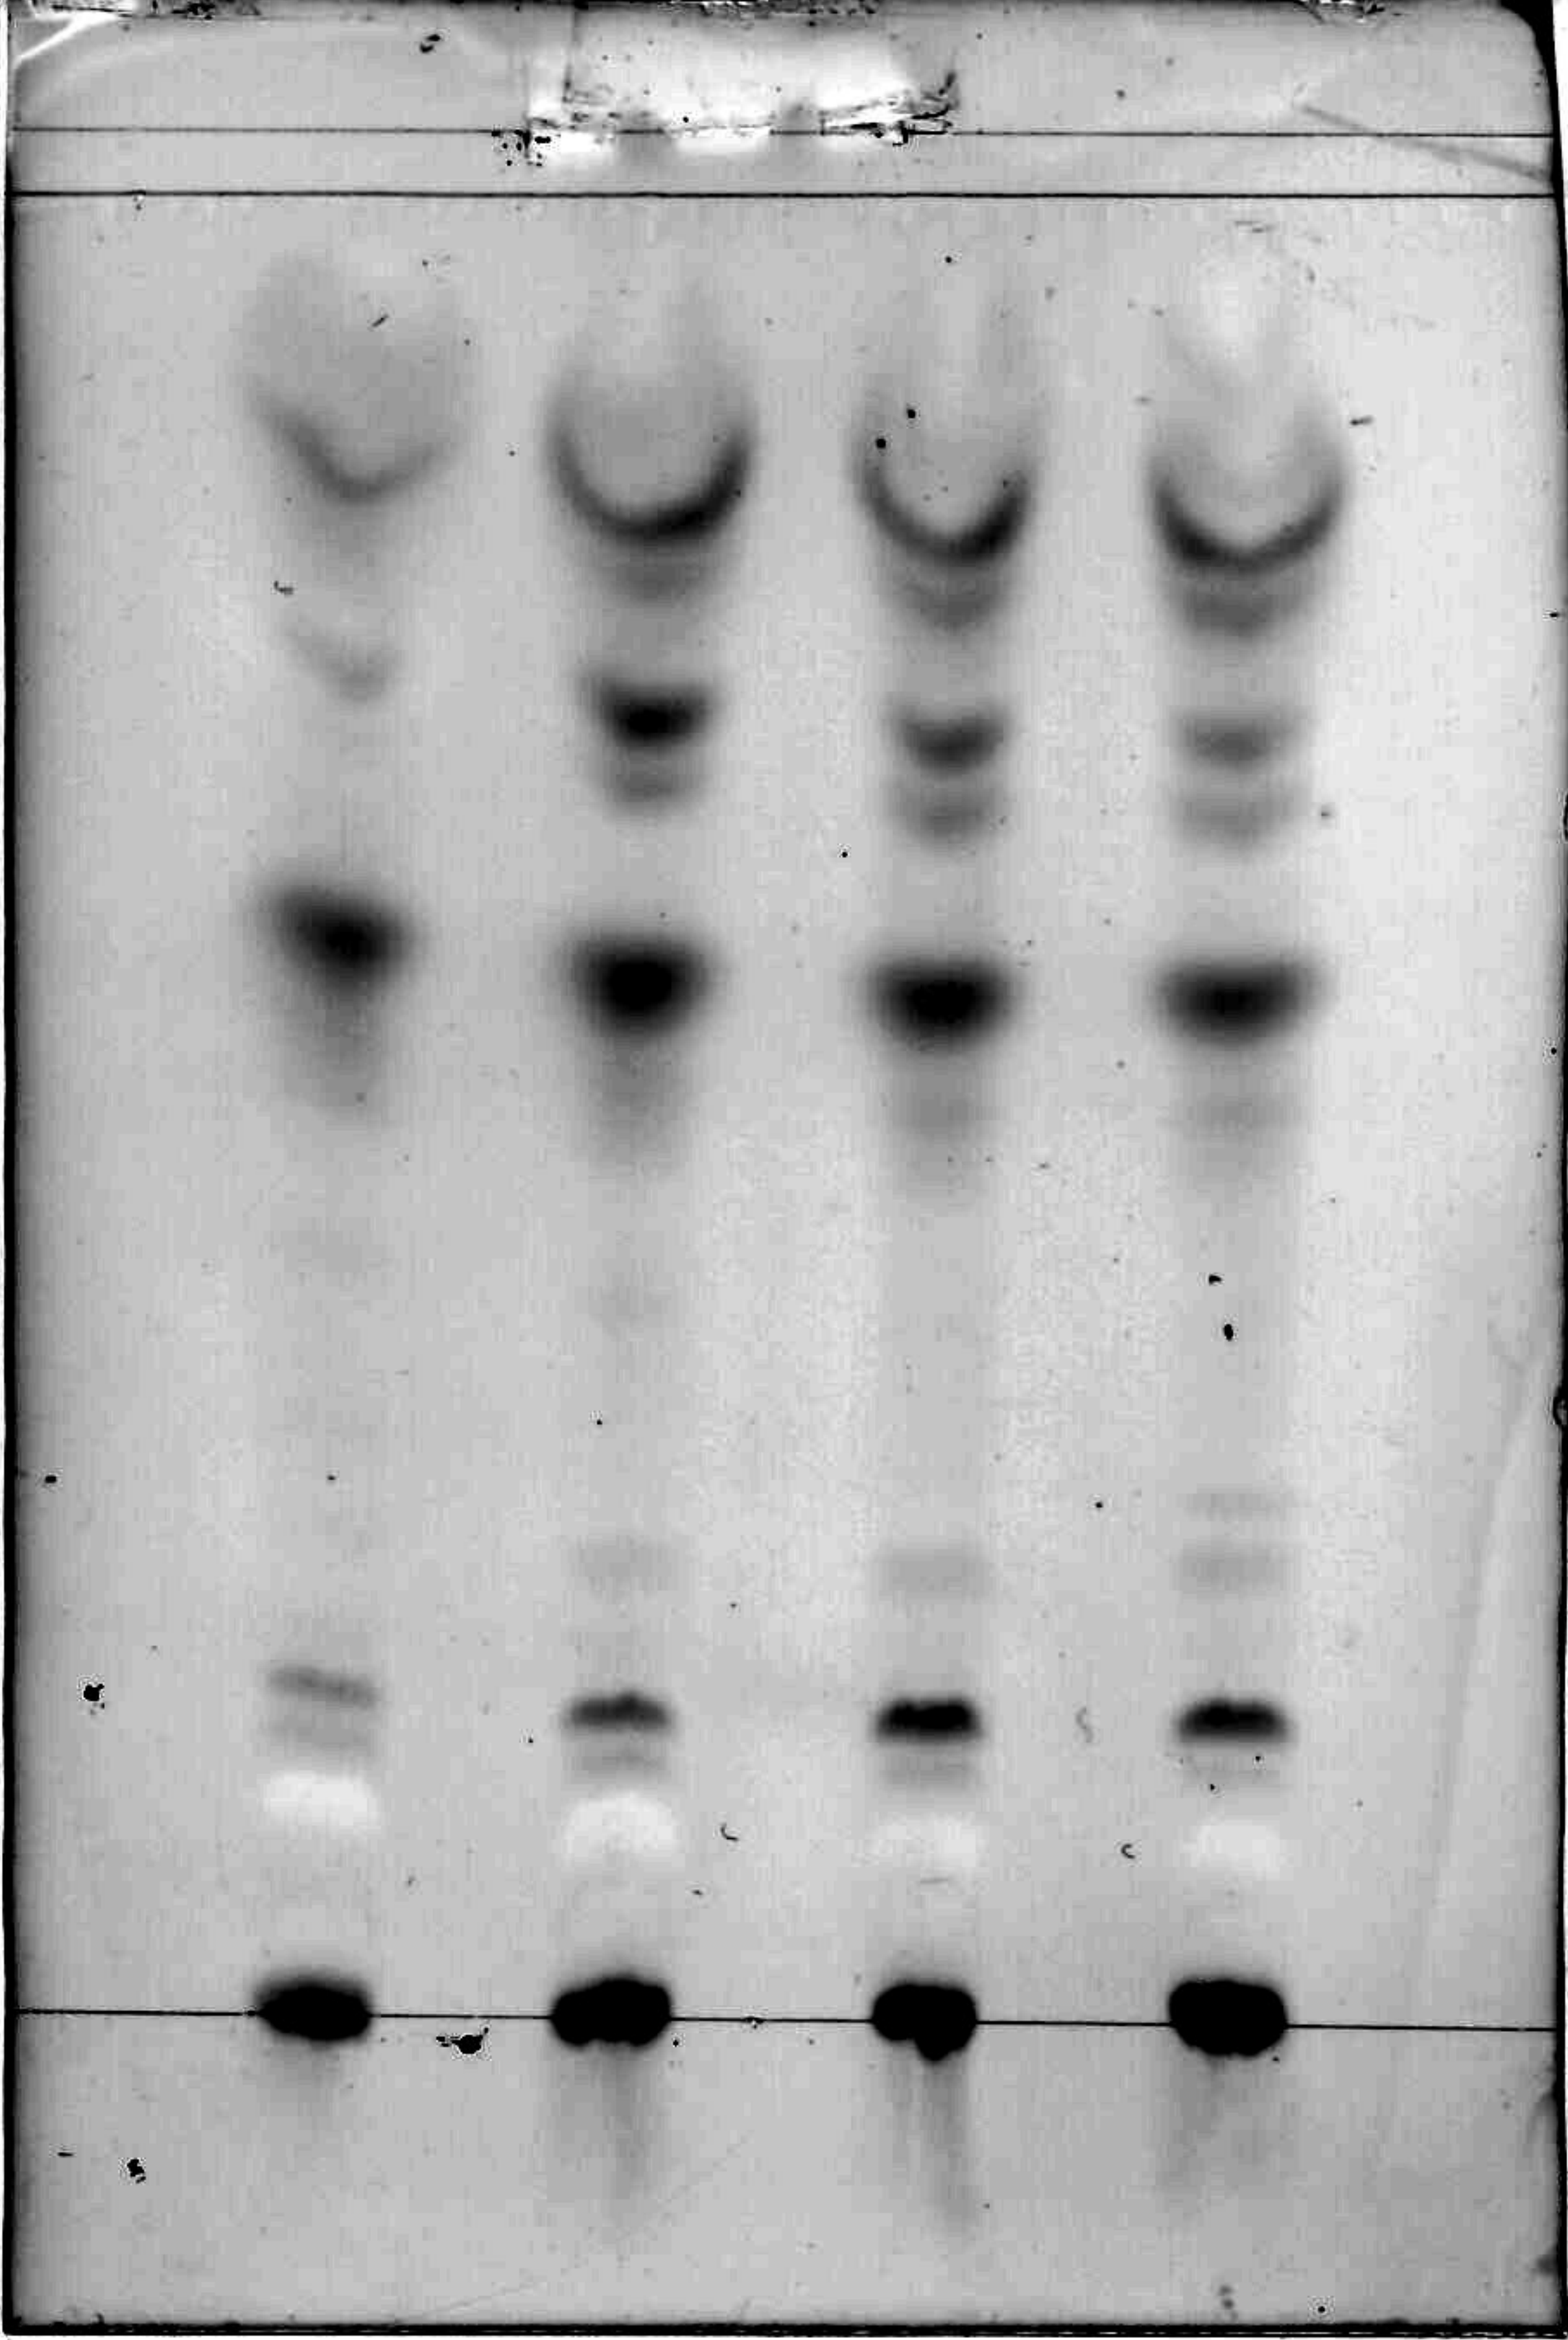

← TDM

← TMM

Supplement: fig3-data4 [file Figure 3 - source data 4.pdf › Figure 3 - source data 4.pdf]

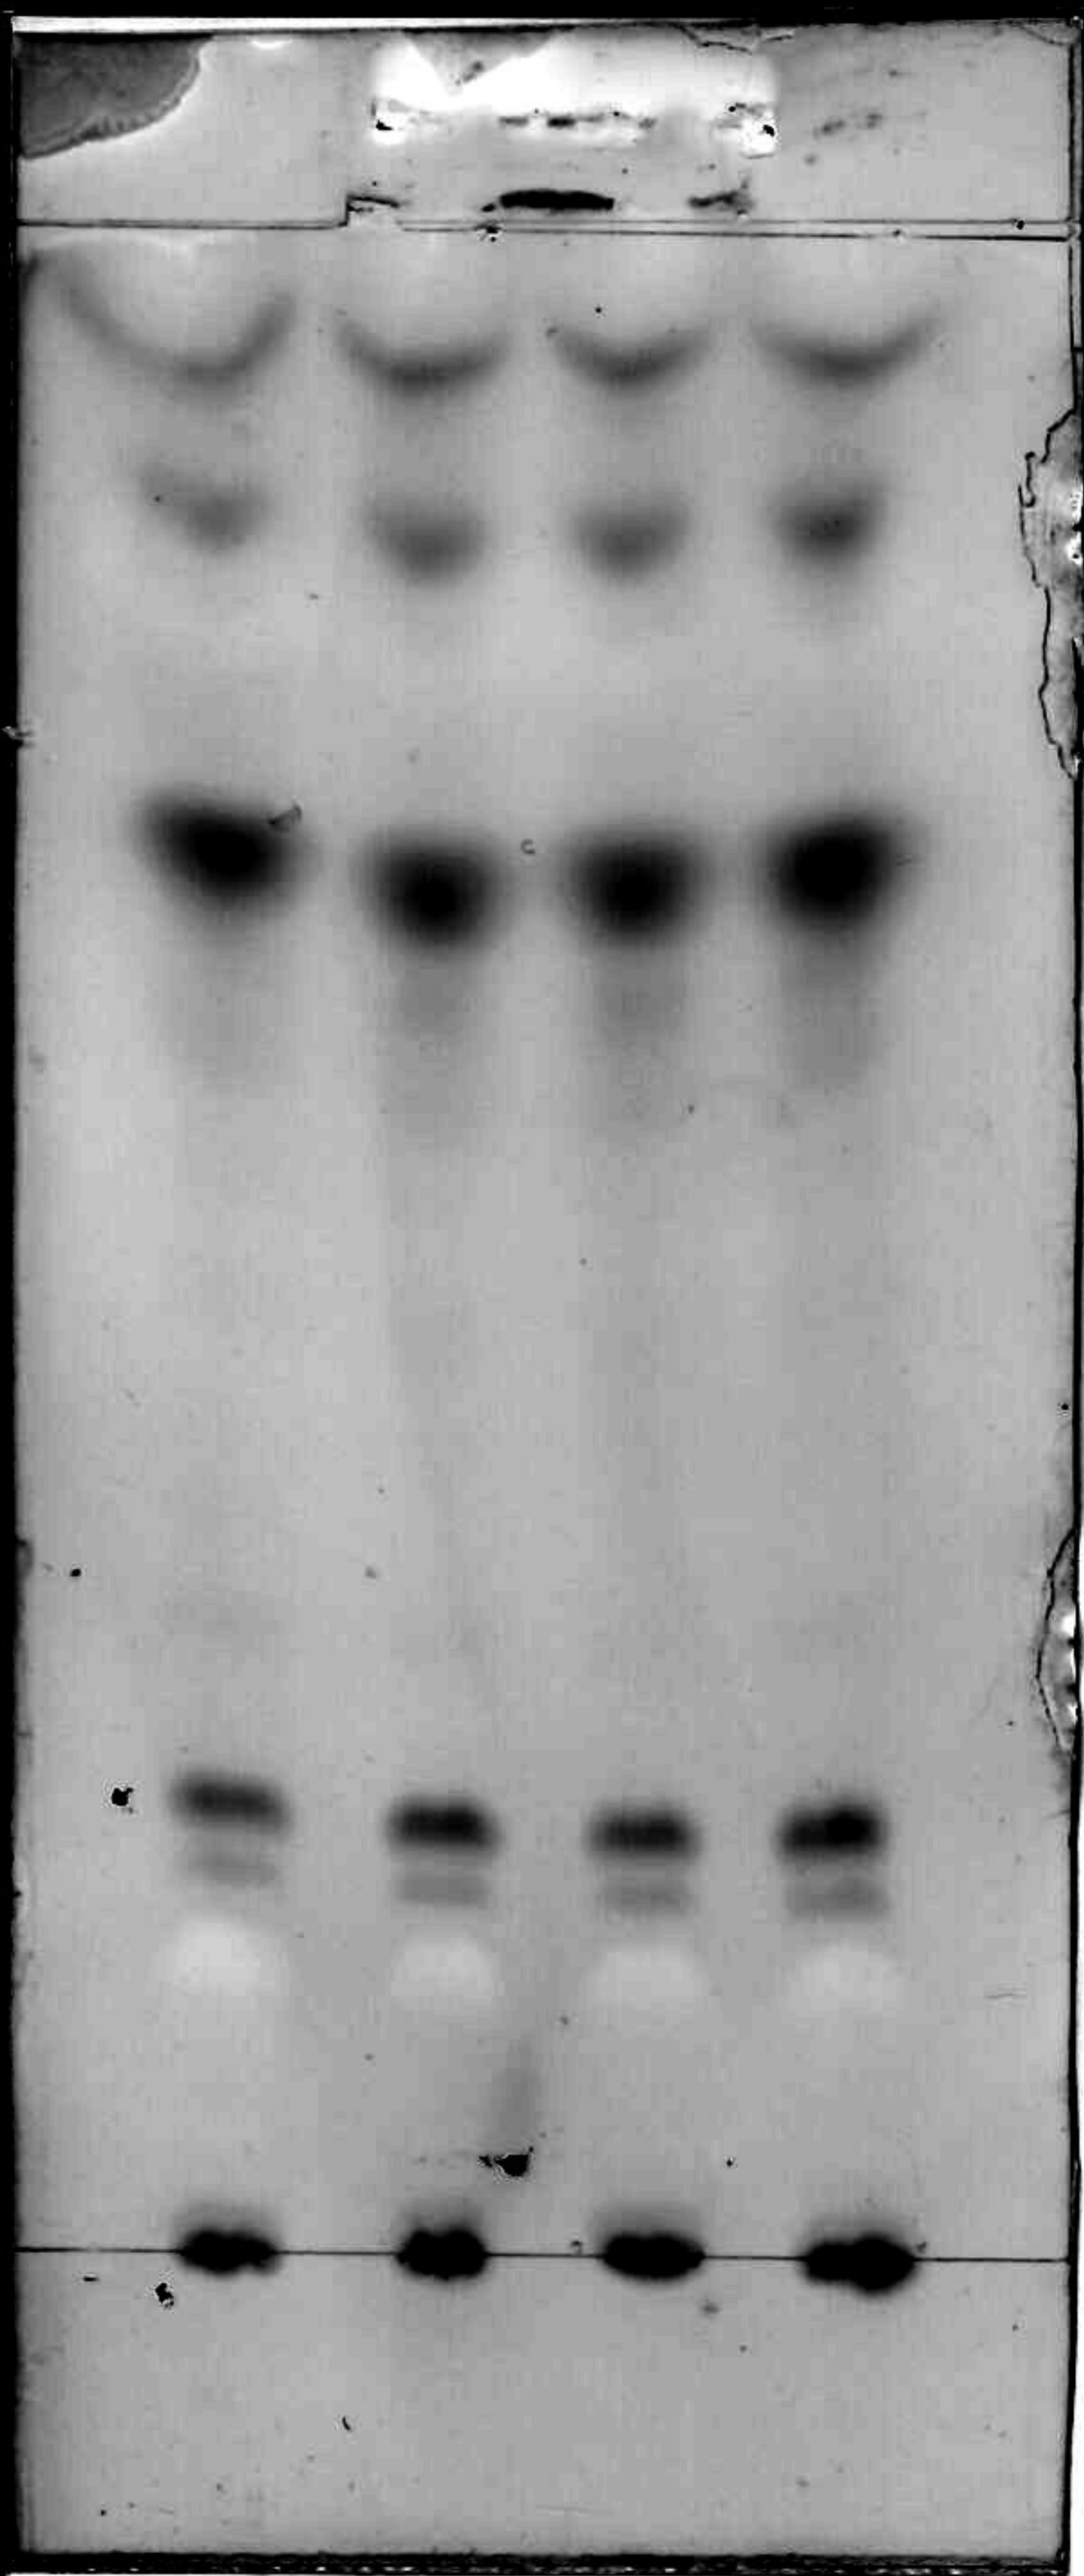

← TDM

← TMM

Supplement: fig3-data6 [file Figure 3 - source data 6.pdf › Figure 3 - source data 6.pdf]

10

8

+

+

+

MSMEG\_0317

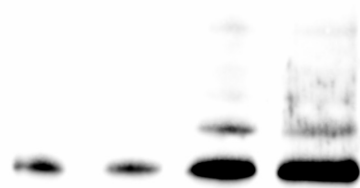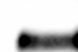

**kDa**  
**250**  
**150**  
**100**  
**75**  
**50**  
**37**  
**25**  
**20**  
**15**  
**10**

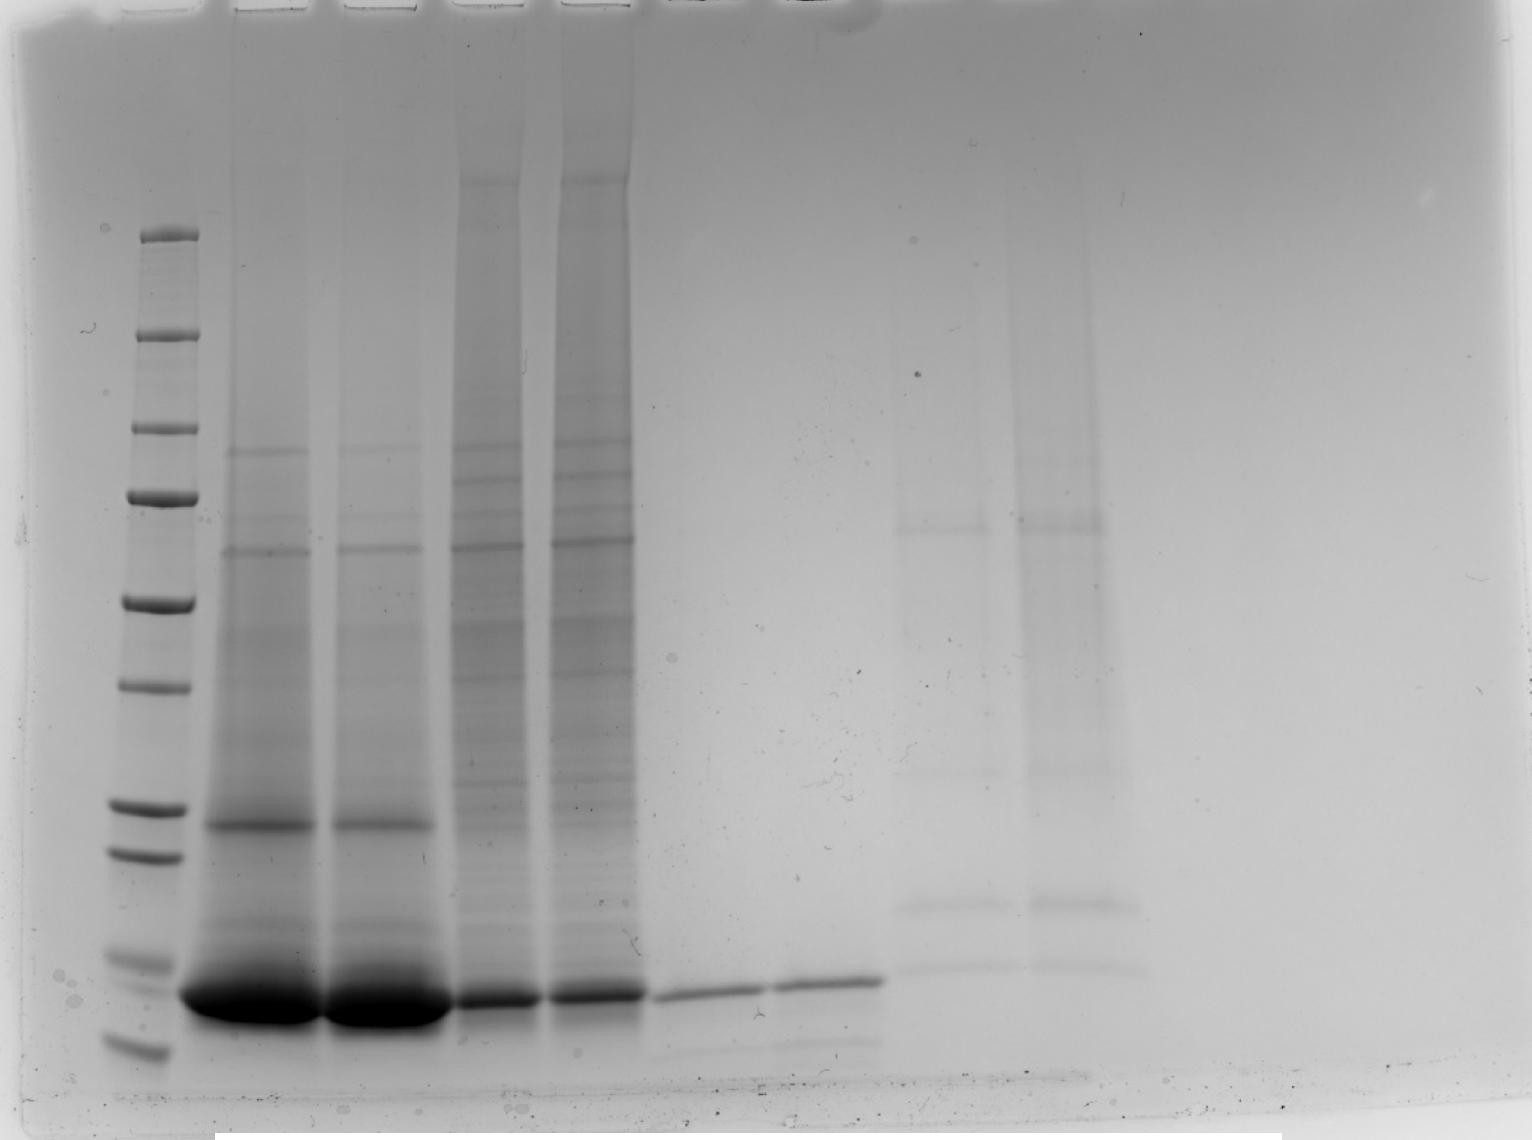

**Lane**

**N-x-AlkTMM-C15**

**UV (365nm)**

**CuAAC (AzTB)**

| 1 | 2 | 3 | 4 | 5 | 6 | 7 | 8 |
|---|---|---|---|---|---|---|---|
| - | - | + | + | - | - | + | + |
| - | + | - | + | - | + | - | + |
| + | + | + | + | + | + | + | + |

kDa  
250  
150  
100  
75  
50  
37  
25  
20  
15  
10

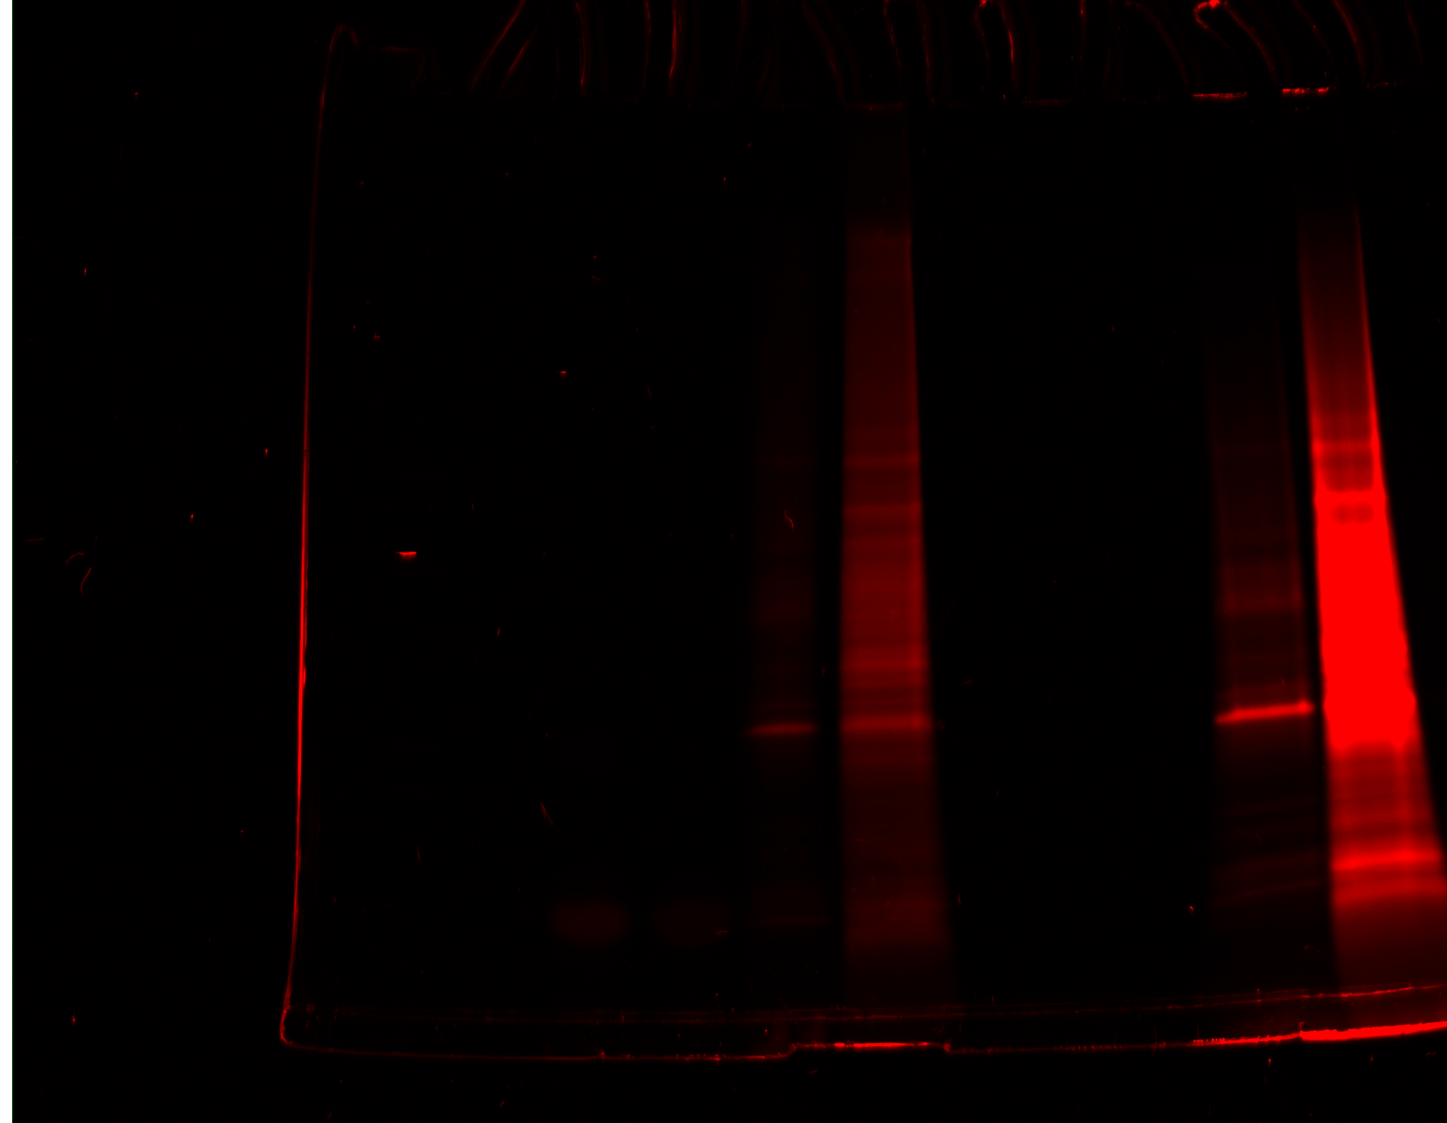

| Lane           | 1 | 2 | 3 | 4 | 5 | 6 | 7 | 8 |
|----------------|---|---|---|---|---|---|---|---|
| N-x-AlkTMM-C15 | - | - | + | + | - | - | + | + |
| UV (365nm)     | - | + | - | + | - | + | - | + |
| CuAAC (AzTB)   | + | + | + | + | + | + | + | + |

Supplement: fig3-figsupp1-data4 [file elife-80395-fig3-figsupp1-data4-v2.zip]

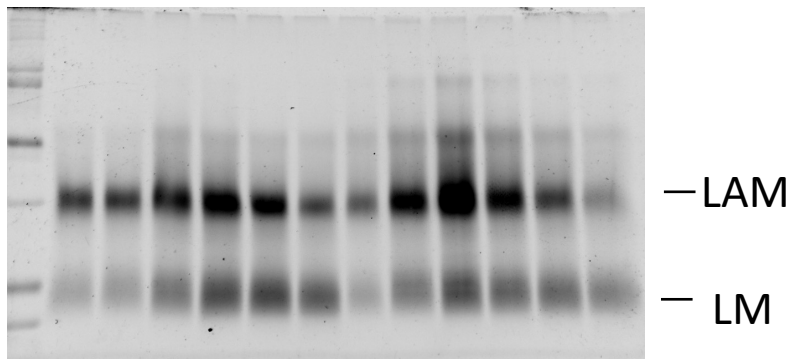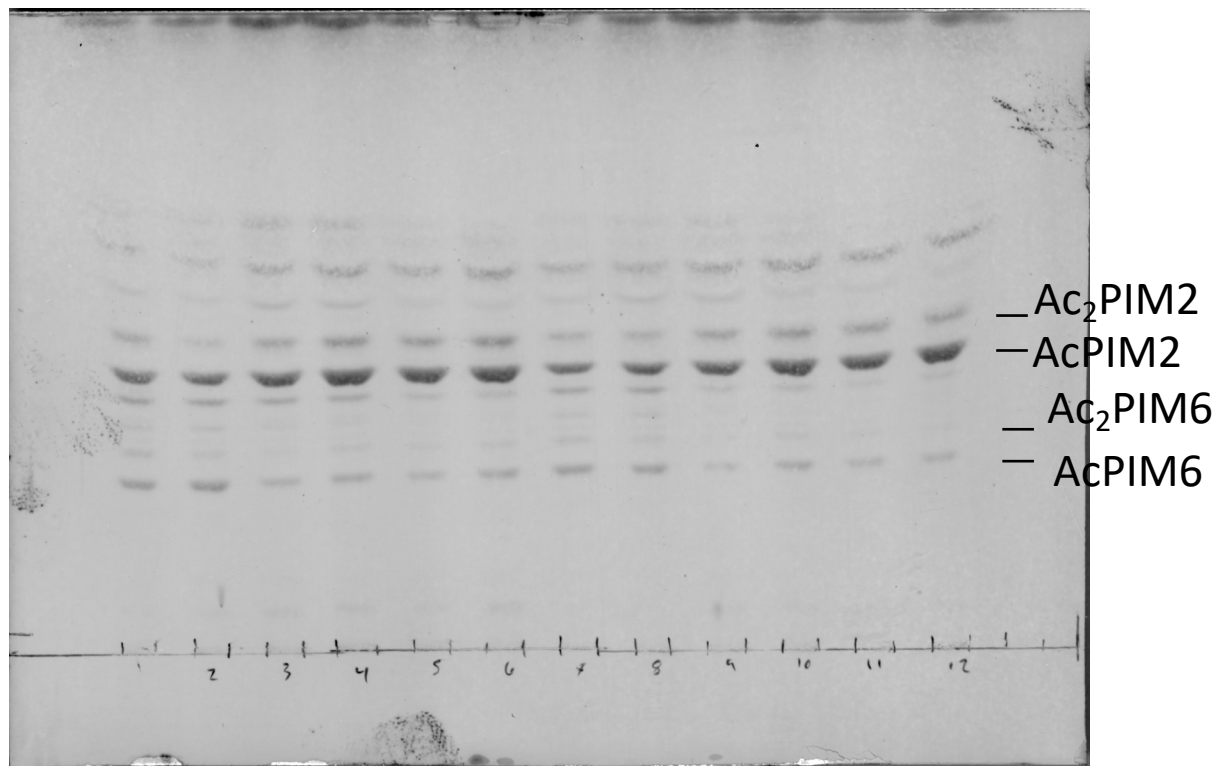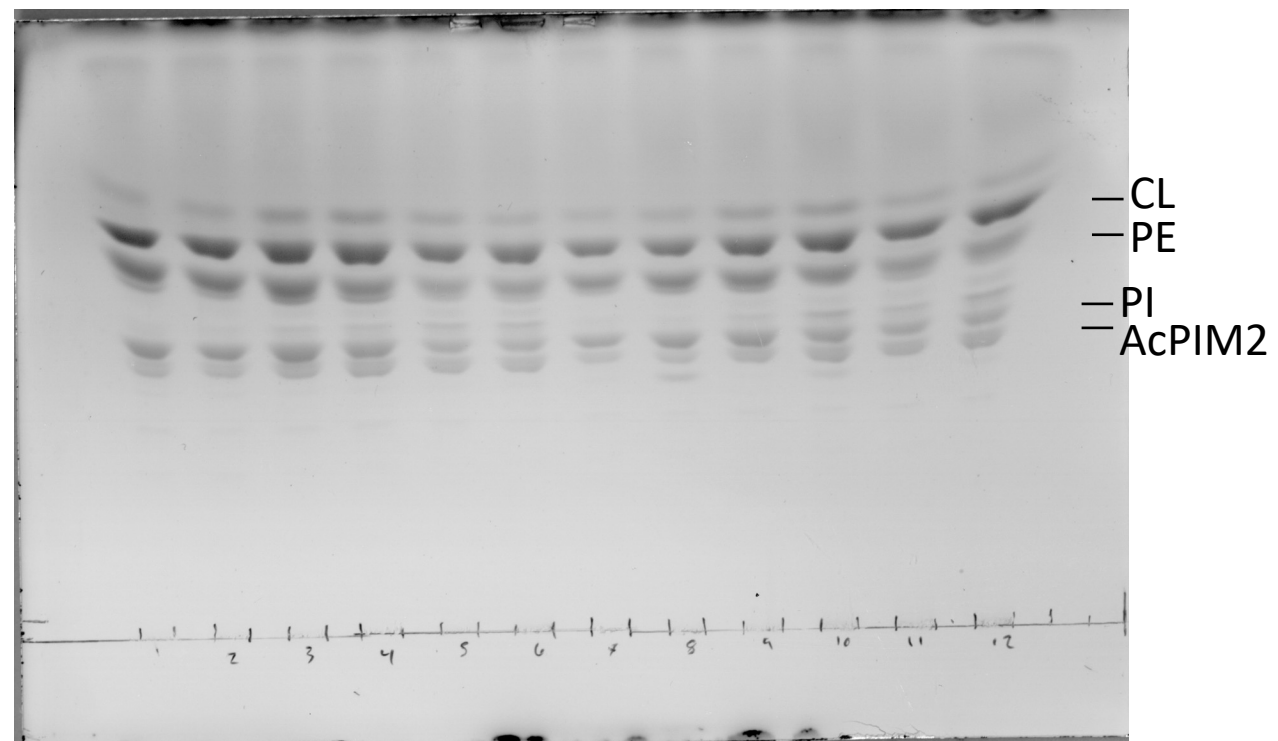

Supplement: fig4-data4 [file Figure 4 - source data 4.pdf › Figure 4 - source data 4.pdf]

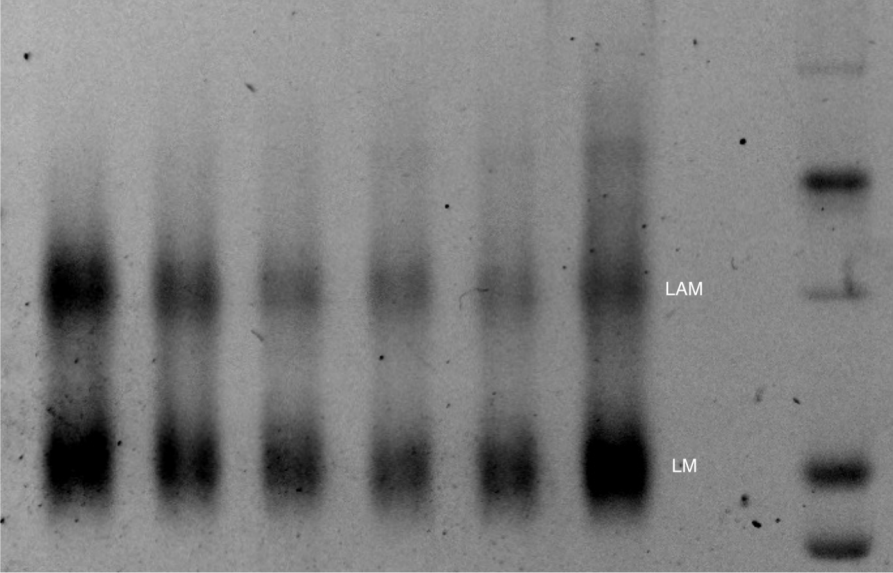

Supplement: fig4-data7 [file Figure 4 - source data 7.pdf › Figure 4 - source data 7.pdf]



— LAM

— LM

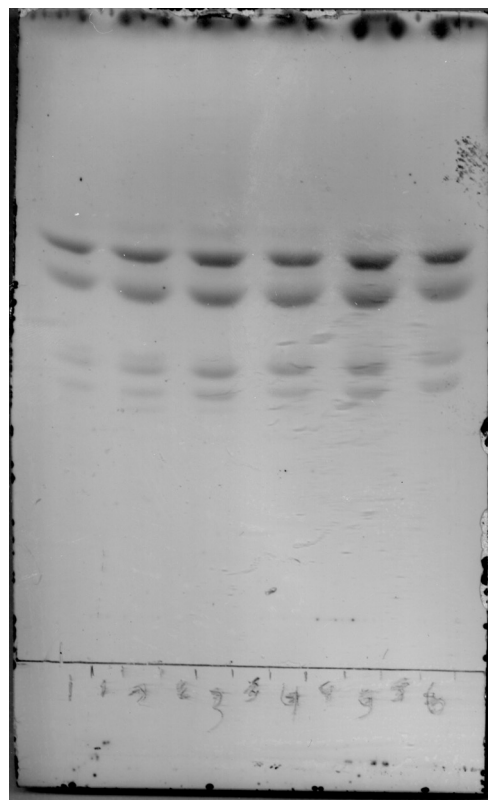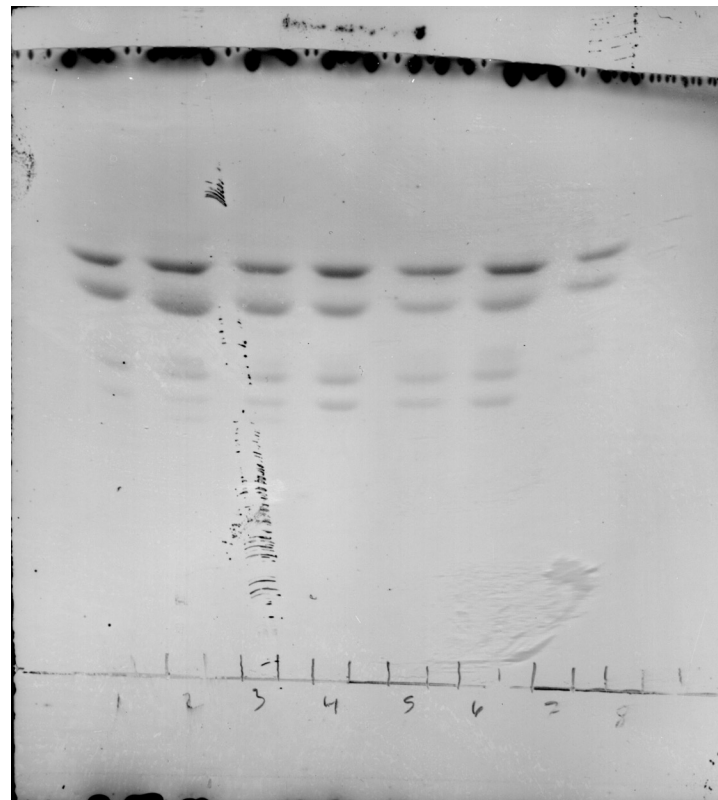

—CL  
—PE  
  
—PI  
—AcPIM2

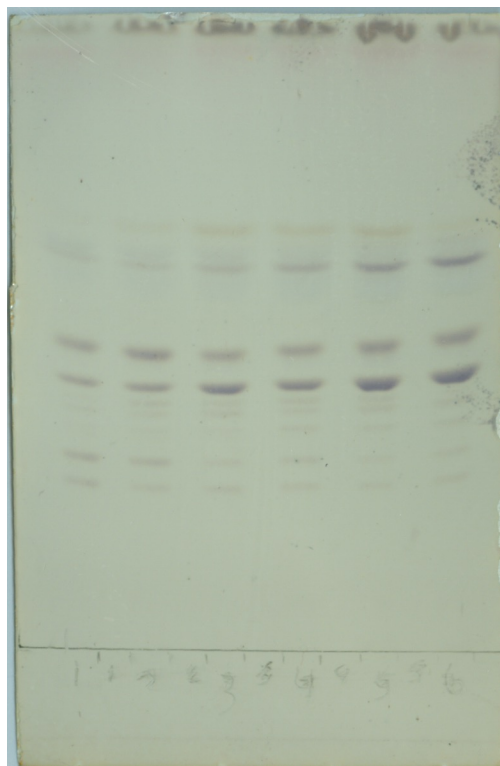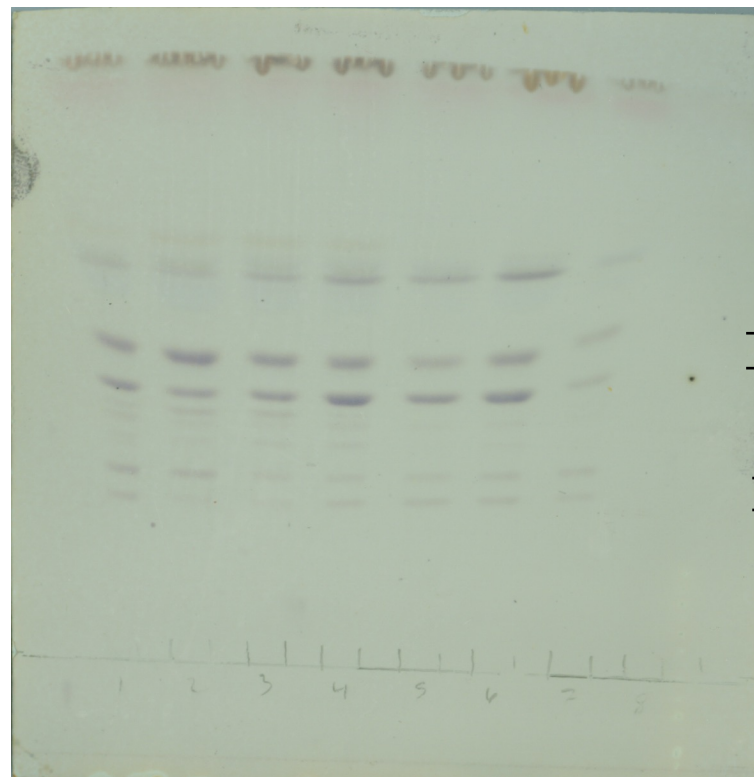

— Ac<sub>2</sub>PIM2  
— AcPIM2  
—  
— AcPIM6

Supplement: fig4-figsupp1-data6 [file elife-80395-fig4-figsupp1-data6-v2.zip]
